# Supplementary material
Source: PubMed Central journal article supplement (PMC8491412)
Supplement: NIHMS1732029-supplement-1.pdf [file NIHMS1732029-supplement-1.pdf]

**Supplemental Table 1.**

|                                                                                                  | <b>All<br/>participants<br/>(n = 135)</b> | <b>Standardized<br/>diet group<br/>(n = 64)</b> | <b>Personalized<br/>diet group<br/>(n = 71)</b> |
|--------------------------------------------------------------------------------------------------|-------------------------------------------|-------------------------------------------------|-------------------------------------------------|
| Percentage of days participants logged at least 50% of daily calorie goal in the PNP application |                                           |                                                 |                                                 |
| <b>mean</b>                                                                                      | <b>36.8</b>                               | <b>27.5</b>                                     | <b>45.1</b>                                     |
| sd                                                                                               | 34.4                                      | 0.0                                             | 0.0                                             |
| 25th percentile                                                                                  | 4.3                                       | 0.6                                             | 9.3                                             |
| <b>median</b>                                                                                    | <b>23.5</b>                               | <b>12.3</b>                                     | <b>43.8</b>                                     |
| 75th percentile                                                                                  | 68.5                                      | 96.3                                            | 97.5                                            |
| Percentage of group counseling sessions attended                                                 |                                           |                                                 |                                                 |
| <b>mean</b>                                                                                      | <b>74.4</b>                               | <b>74.4</b>                                     | <b>74.3</b>                                     |
| sd                                                                                               | 26.2                                      | 25.6                                            | 26.8                                            |
| 25th percentile                                                                                  | 64.3                                      | 64.3                                            | 64.3                                            |
| <b>median</b>                                                                                    | <b>85.7</b>                               | <b>85.7</b>                                     | <b>85.7</b>                                     |
| 75th percentile                                                                                  | 92.9                                      | 92.9                                            | 92.9                                            |
